# Supplementary material for: Edge-, width- and strain-dependent semiconductor–metal transition in SnSe nanoribbons
Source: Royal Society of Chemistry journal article supplement (doi:10.1039/c3ra45724a), 2013-11-11
Supplement: c3ra45724a.pdf [file c3ra45724a.pdf]

## Supplementary Information

### Edge-, width- and strain-dependent semiconductor-metal transition in SnSe nanoribbons

Yucheng Huang<sup>\*</sup>, Chongyi Ling, Hai Liu, Sufang Wang.

Center for Nano Science and Technology, College of Chemistry and Material  
Science, The Key Laboratory of Functional Molecular Solids, Ministry of Education,  
Anhui Normal University, Wuhu, 241000, Peoples' Republic of China

Table S1. Test calculations for energy cutoff and k-points settings.

| Energy cutoff | Energy of bulk<br>SnSe (eV) | Number of<br>k-points | Energy of 5-ZNR<br>(eV) |
|---------------|-----------------------------|-----------------------|-------------------------|
| 100           | -33.526887                  | 3                     | -77.281321              |
| 150           | -32.780371                  | 4                     | -77.280047              |
| 200           | -32.809316                  | 5                     | -77.277008              |
| 250           | -32.830009                  | 6                     | -77.275635              |
| 300           | -32.83318                   | 7                     | -77.275768              |
| 350           | -32.833772                  | 8                     | -77.275682              |
| 400           | -32.834969                  | 9                     | -77.275688              |
| 450           | -32.833962                  | 10                    | -77.275667              |

<sup>\*</sup> E-mail: huangyc@mail.ahnu.edu.cn.
